# Supplementary material
Source: publisher figshare collection journal article supplement (https://acs.figshare.com/ndownloader/files/15455063)
Supplement: Supplementary file 1 [file 15455063]

## Supporting Information

### **Achieving Efficient CO<sub>2</sub> Electrochemical Reduction on Tunable In(OH)<sub>3</sub> Coupled Cu<sub>2</sub>O Derived Hybrid Catalyst**

Tengfei Li,<sup>a,b</sup> Hongmei Wei,<sup>b</sup> Tianmo Liu,<sup>b,\*</sup> Gengfeng Zheng,<sup>c,\*</sup> Subiao Liu,<sup>a</sup>

Jing-Li Luo<sup>a,\*</sup>

<sup>a</sup> Department of Chemical and Materials Engineering, University of Alberta,  
Edmonton, Alberta T6G 1H9, Canada

<sup>b</sup> College of Materials Science and Engineering, Chongqing University, Chongqing  
400044, China

<sup>c</sup> Laboratory of Advanced Materials, Department of Chemistry and Shanghai Key  
Laboratory of Molecular Catalysis and Innovative Materials, Collaborative Innovation  
Center of Chemistry for Energy Materials, Fudan University, Shanghai 200438, China

\* Corresponding authors:

Prof. Tianmo Liu (E-mail: [tmliu@cqu.edu.cn](mailto:tmliu@cqu.edu.cn))

Prof. Gengfeng Zheng (E-mail: [gfzheng@fudan.edu.cn](mailto:gfzheng@fudan.edu.cn))

Prof. Jing-Li Luo (E-mail: [jingli.luo@ualberta.ca](mailto:jingli.luo@ualberta.ca))

## **Table of Contents**

1. Experimental section
  - 1.1. Electrocatalyst synthesis
  - 1.2. Structural characterization
  - 1.3. Electrochemical measurements
2. Supplementary Figures (Figure S1-S10)
3. Supplementary Table (Table S1)

## **1. Experimental section**

### **1.1. Electrocatalyst synthesis**

Copper(II) sulfate pentahydrate ( $\text{CuSO}_4 \cdot 5\text{H}_2\text{O}$ , 99+%, ACROS Organics), sodium hydroxide (NaOH, 97%, Fisher Chemical), L-Ascorbic Acid (AA, 99%, Fisher Chemical) and Indium(III) nitrate hydrate ( $\text{In}(\text{NO}_3)_3 \cdot x\text{H}_2\text{O}$ , 99.99%, Alfa Aesar) were used without further purification. Potassium bicarbonate ( $\text{KHCO}_3$ , 99.7%, Fisher Chemical) was used for the electrolyte.

In a typical procedure, 90 mL of deionized water was introduced into a 200-mL beaker. Subsequently, 1 mL of 0.1 M  $\text{CuSO}_4$  solution was added to the beaker. The beaker was kept in a water bath at 35 °C throughout the synthesis. Next, 4.75 mL of 1.0 M NaOH solution was introduced into the beaker with vigorous stirring. Then, it was observed that the solution turned light blue immediately, indicating the formation of  $\text{Cu}(\text{OH})_2$  precipitate. With the addition of 5 mL of 0.2 M AA solution, the above solution turned to orange-yellow from light green gradually. The solution was stirred for 10 min for  $\text{Cu}_2\text{O}$  crystal growth in the water bath. Then the different volumes (0, 3, 6 and 7 mL) of 0.01 M  $\text{In}(\text{NO}_3)_3$  solution were added to the above solution. After another 10 min, pure  $\text{Cu}_2\text{O}$  and  $\text{In}(\text{OH})_3$  coupled  $\text{Cu}_2\text{O}$  hybrid materials of ICC-HM-3, -6, and -7 were respectively collected by suction filtration and washed with deionized water and ethanol thoroughly to remove residual ions and dried in a vacuum oven at 60°C for 12 hours for further characterization.

### **1.2. Structural characterizations**

The crystalline structure of the samples was characterized by X-ray diffraction

(XRD) analysis with a Rigaku XRD Ultima IV diffractometer using Cu K $\alpha$  radiation generated at 40 kV and 44 mA. The XRD pattern was recorded within a 2 $\theta$  range from 20 to 80 at 2° min<sup>-1</sup>. The morphology of the materials was imaged using a Zeiss Sigma Field Emission SEM (FESEM). The composition was analyzed with an Orbis PC Micro-XRF Analyzer. Transmission electron microscopy (TEM) characterization was performed using an H-9500 environmental transmission electron microscope with an accelerating voltage of 300 kV. Scanning transmission electron microscopy (STEM) with energy-dispersive X-ray spectroscopy (EDS) was carried out at a JOEL 2200 FS Field Emission Transmission Electron Microscopy (FETEM) with Schottky field emission gun at 200 kV.

### **1.3. Electrochemical measurements**

To prepare the working electrode, a suspension with a proportion of 15 mg of powders (10 mg of electrocatalysts and 5 mg of carbon black), 0.76 mL of ethanol, 1.14 mL of DI water, and 100  $\mu$ L of 5 wt.% Nafion solution was sonicated to achieve a homogeneous dispersion. The resulting suspension was then painted onto one side of a Toray carbon paper (1 cm  $\times$  2 cm, Toray TGP-H-060, Toray Industries Inc.) to achieve an electrocatalyst loading of 1 mg cm<sup>-2</sup>. All the potentials were recorded against the reference electrode and converted to the reversible hydrogen electrode (RHE) reference scale by the equation,  $E_{\text{RHE}} = E_{\text{SCE}} + 0.241 + 0.0591 \times \text{pH}$ . The pH values of CO<sub>2</sub>-saturated 0.1, 0.3, 0.5, and 0.7 M KHCO<sub>3</sub> were 6.8, 7.2, 7.5, and 7.6, respectively. The current densities in this work were all normalized to the geometric surface area.

All the experiments were carried out on a potentiostat/galvanostat (Autolab

PGSTAT302N) in a two-compartment gastight H-cell separated by a Nafion membrane (Nafion<sup>®</sup> 117, Alfa Aesar) with a saturated calomel electrode (SCE) reference electrode and a piece of platinum gauze (3 cm × 3 cm) counter electrode. Each compartment contains 39 mL of electrolyte and leaves a headspace of about 31 mL. The KHCO<sub>3</sub> aqueous solution was used as electrolyte directly without any purification. Prior to the CO<sub>2</sub> reduction, the cathodic electrolyte was saturated with CO<sub>2</sub> (99.99%, Praxair Canada Inc.) at a flow rate of 20.0 mL min<sup>-1</sup> controlled by a mass flow controller (Brooks Instrument). In order to enhance the mass transport of CO<sub>2</sub>, the catholyte was magnetically stirred during the electrolysis. The gas products of CO<sub>2</sub> electroreduction from the cathode compartment were analyzed using the on-line gas chromatography (GC, Agilent 6890N) equipped with a flame ionization detector (FID) and a thermal conductivity detector (TCD). The FID with methanizer was used to quantify CO, CH<sub>4</sub>, C<sub>2</sub>H<sub>4</sub>, and C<sub>2</sub>H<sub>6</sub>, and the TCD was used to quantify H<sub>2</sub>. A standard gas mixture composed of CH<sub>4</sub>, C<sub>2</sub>H<sub>4</sub>, C<sub>2</sub>H<sub>6</sub>, CO, H<sub>2</sub>, and CO<sub>2</sub> (Praxair Canada Inc.) was applied to obtain the calibration curve for each component. Argon was employed as the carrier gas. Every GC run lasts for 8.4 min. For every potential, the first GC run was initiated at the 10<sup>th</sup> min, and thereafter reinitiated every 8.4 min for twice. The average of the results from these three measurements was used in the data analysis. The liquid phase products were measured by <sup>1</sup>H NMR.

## 2. Supplementary Figures (Figure S1-S10)

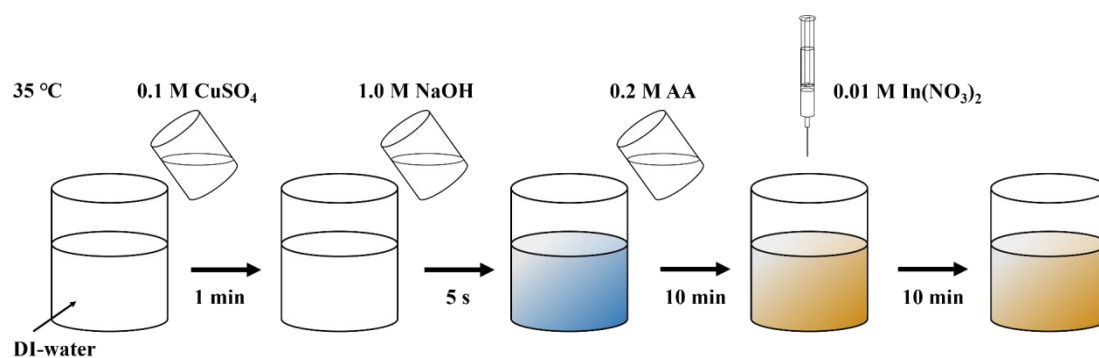

Figure S1. Schematic illustration of the fabrication procedures of  $\text{In}(\text{OH})_3$  coupled  $\text{Cu}_2\text{O}$  hybrid material.

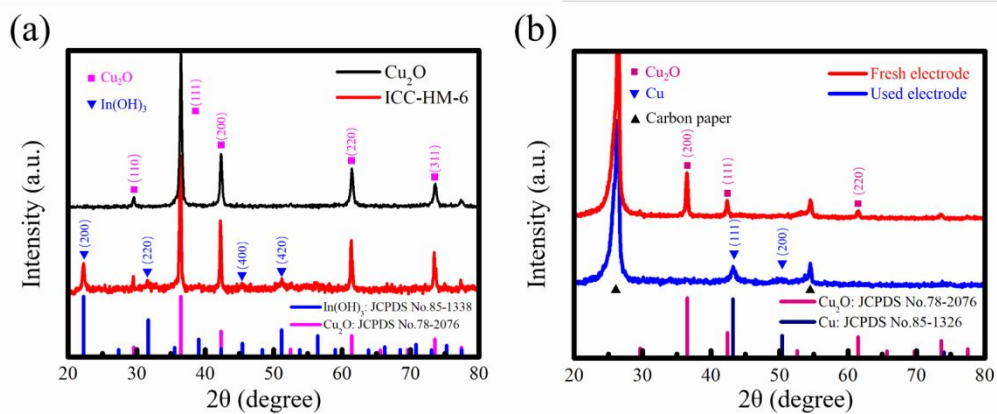

Figure S2. (a) X-ray diffraction (XRD) patterns of as-prepared  $\text{Cu}_2\text{O}$  and ICC-HM-6.

(b) XRD patterns of freshly prepared and electrochemical reduced electrodes of ICC-HM-6.

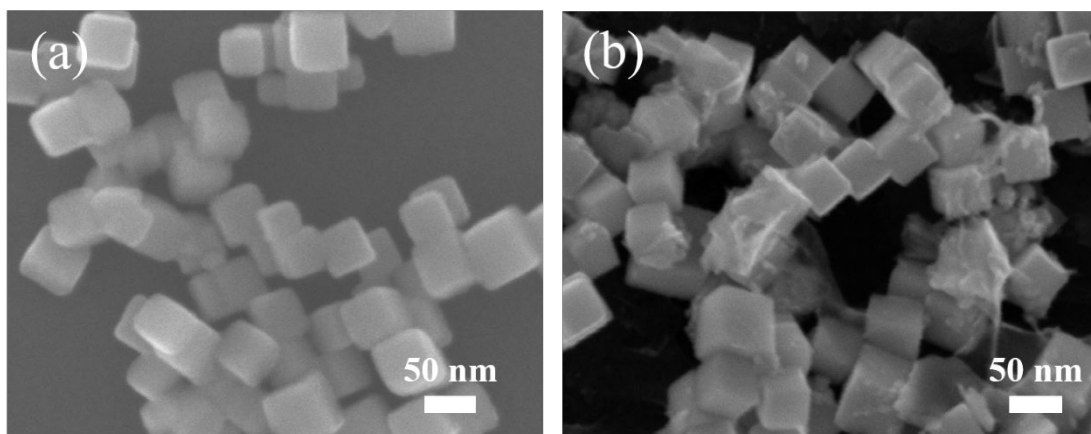

Figure S3. SEM images of (a) Cu<sub>2</sub>O and (b) ICC-HM-6.



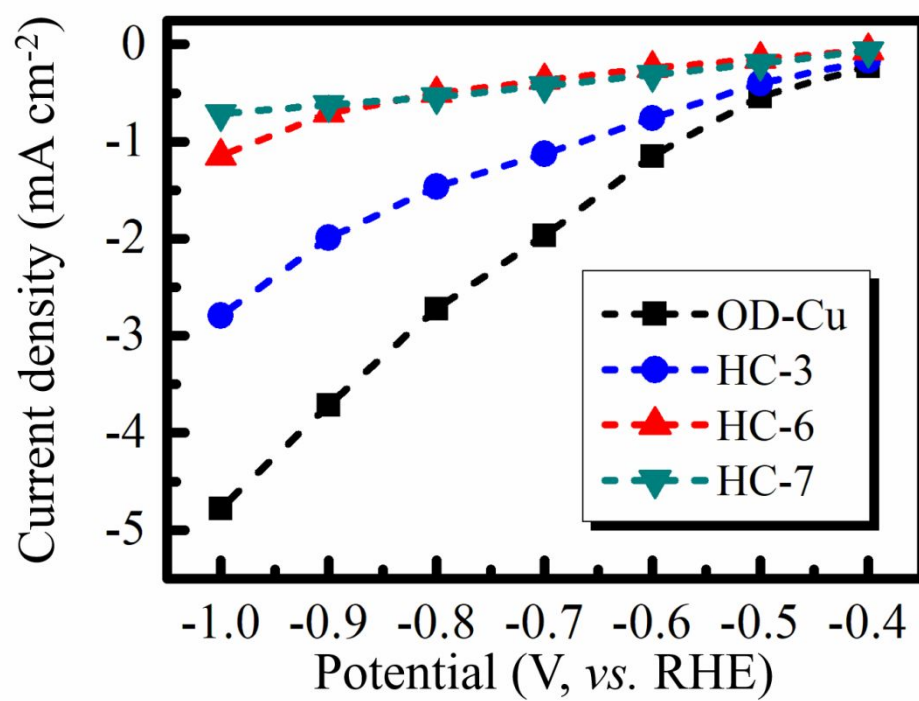

Figure S4. H<sub>2</sub> partial current density at each potential of the different catalysts.

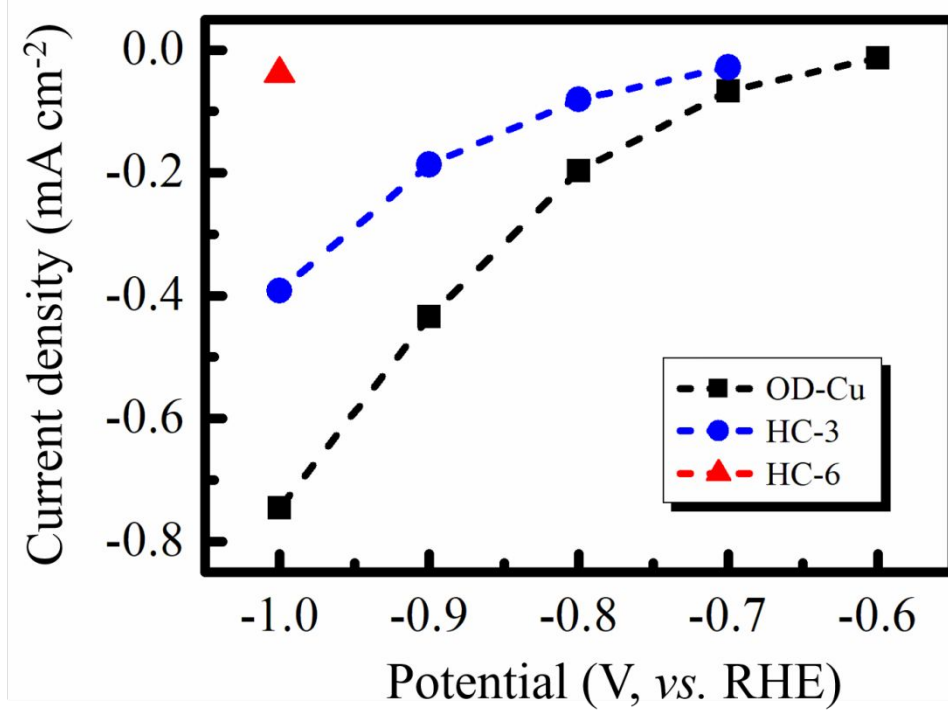

Figure S5.  $C_2H_4$  partial current density at each potential of the different catalysts.

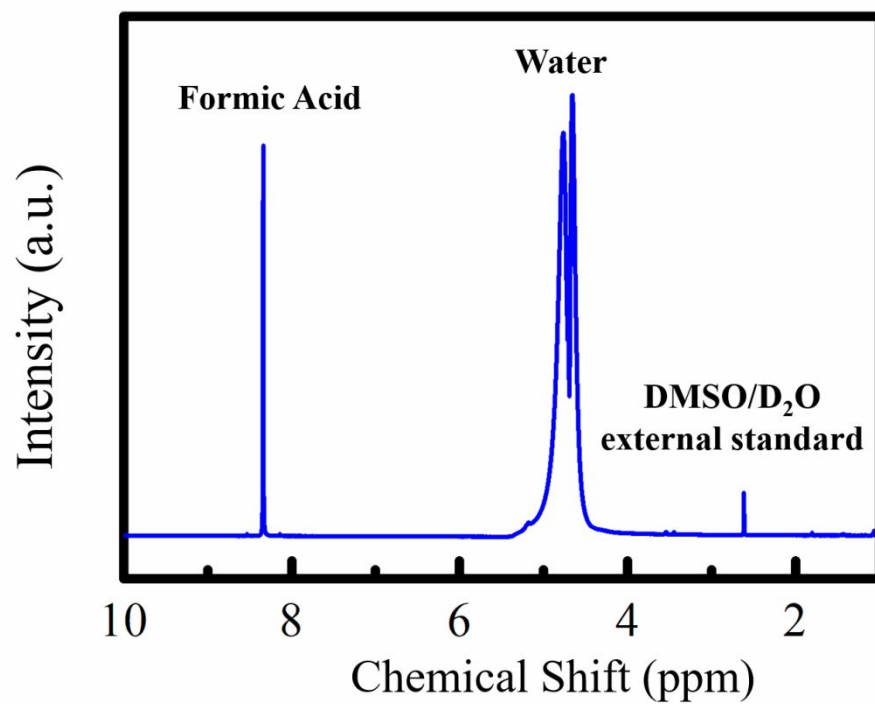

Figure S6.  $^1\text{H}$  NMR spectrum on the electrolyte after the 12 hours of electrolysis.

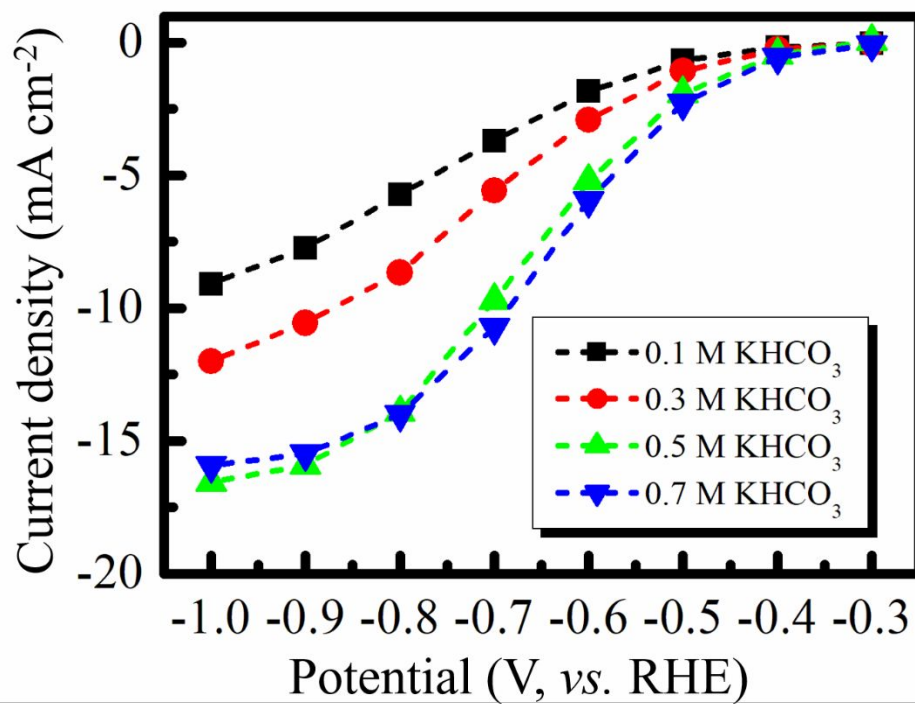

Figure S7. CO partial current density of HC-6 at each potential in different concentrations of KHCO<sub>3</sub>.

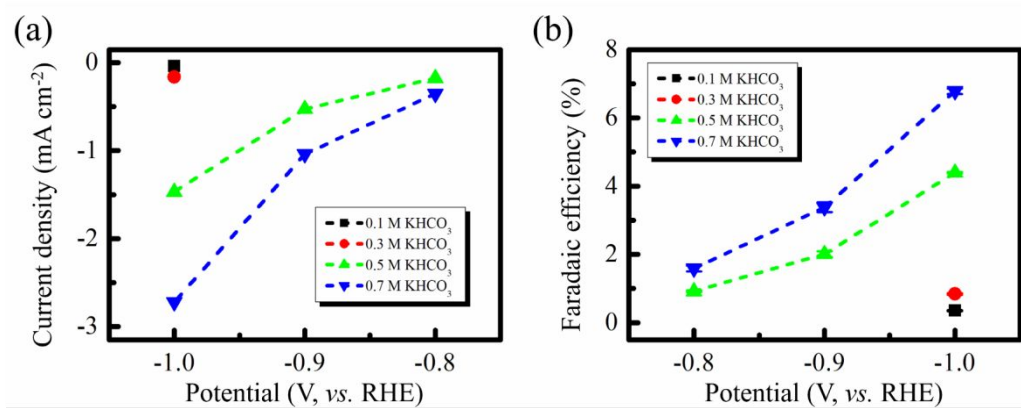

Figure S8. (a)  $C_2H_4$  partial current density and (b) FEs of  $C_2H_4$  for HC-6 at each potential in different concentrations of  $KHCO_3$ .

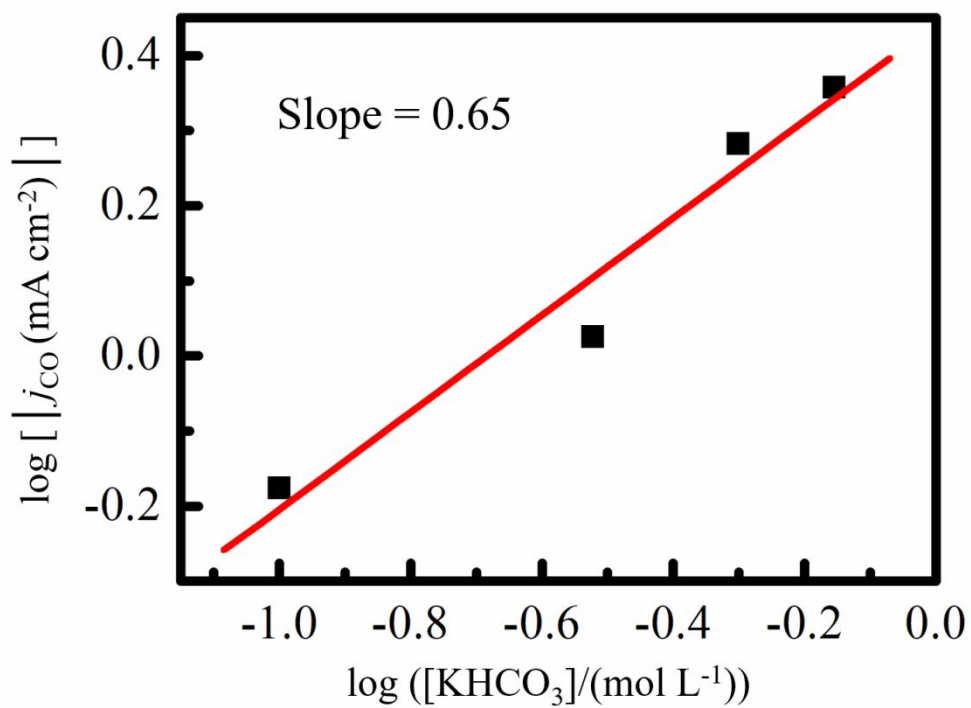

Figure S9. Partial CO current density of HC-6 vs. potassium bicarbonate concentration at a constant potential of  $-0.5 \text{ V}$  vs. RHE.

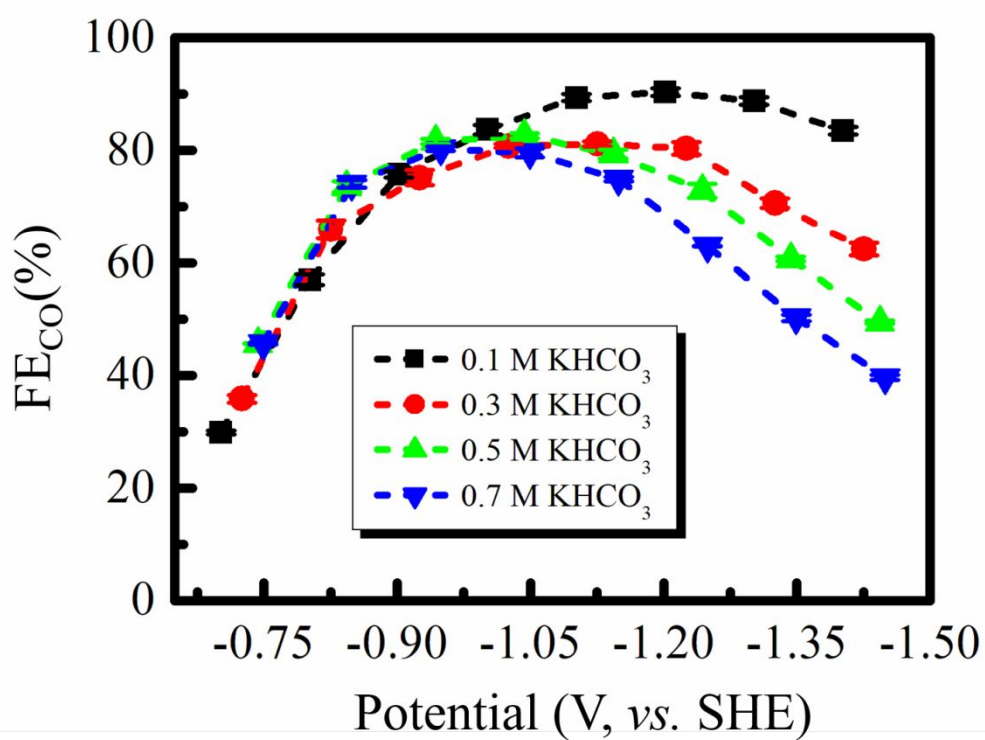

Figure S10. Faradaic efficiencies of CO ( $FE_{CO}$ ) for HC-6 in  $CO_2$ -saturated  $KHCO_3$  solution with different concentrations as a function of potential on the SHE scale.

### 3. Supplementary Table (Table S1)

Table S1. In content of the as-prepared catalysts expressed as the atomic ratio of In to (Cu+In).

|             | HC-3 | HC-6 | HC-7 |
|-------------|------|------|------|
| In/(Cu+In)% | 1.43 | 2.46 | 4.21 |
